# Supplementary material for: Exposure–Efficacy Analyses Support Optimal Dosing Regimens of Ceftolozane/Tazobactam in Participants with Hospital-Acquired/Ventilator-Associated Bacterial Pneumonia in ASPECT-NP
Source: PubMed Central journal article supplement (PMC9112930; doi:10.1128/aac.01399-21), 2022-04-26
Supplement: aac.01399-21-s0001.pdf [file aac.01399-21-s0001.pdf]

1 **TABLE S1** Baseline characteristics of ASPECT-NP participants by population<sup>a</sup>

| <b>Characteristic</b>                    | <b>Statistic or group</b>           | <b>EEA population<br/>dataset (N = 231)</b> | <b>ITT population<br/>(N = 362)</b> |
|------------------------------------------|-------------------------------------|---------------------------------------------|-------------------------------------|
| Age, yrs                                 | Mean (SD)                           | 60.0 (16.4)                                 | 60.5 (16.7)                         |
|                                          | Median (min–max)                    | 62.0 (18–98)                                | 62.5 (18–98)                        |
| Age group, <i>n</i> (%)                  | <65 yrs                             | 131 (56.7)                                  | 202 (55.8)                          |
|                                          | ≥65 yrs                             | 100 (43.3)                                  | 160 (44.2)                          |
|                                          | <75 yrs                             | 184 (79.7)                                  | 279 (77.1)                          |
|                                          | ≥75 yrs                             | 47 (20.3)                                   | 83 (22.9)                           |
| Body weight, kg                          | Mean (SD)                           | 81.2 (16.6)                                 | 80.9 (17.3) <sup>c</sup>            |
|                                          | Median (min–max)                    | 80.0 (42.0–146.0)                           | 80.0 (34.0–150.1) <sup>c</sup>      |
| CrCl, mL/min <sup>b</sup>                | Mean (SD)                           | 108.5 (60.0)                                | 105.0 (59.3) <sup>d</sup>           |
|                                          | Median (min–max)                    | 97.1 (16.0–427.9)                           | 95.0 (16.0–427.9) <sup>d</sup>      |
| CrCl category, <i>n</i> (%) <sup>b</sup> | ≥150 mL/min (ARC)                   | 46 (19.9)                                   | 67 (18.5)                           |
|                                          | ≥80 to <150 mL/min (normal)         | 109 (47.2)                                  | 160 (44.2)                          |
|                                          | >50 to <80 mL/min (mild impairment) | 46 (19.9)                                   | 82 (22.7)                           |

| Characteristic     | Statistic or group                    | EEA population            | ITT population               |
|--------------------|---------------------------------------|---------------------------|------------------------------|
|                    |                                       | dataset ( <i>N</i> = 231) | ( <i>N</i> = 362)            |
|                    | ≥30 to ≤50 mL/min (moderate)          | 19 (8.2)                  | 35 (9.7)                     |
|                    | ≥15 to <30 mL/min (severe impairment) | 11 (4.8)                  | 17 (4.7)                     |
| APACHE II score    | Mean (SD)                             | 17.4 (5.1)                | 17.5 (5.2) <sup>d</sup>      |
|                    | Median (min–max)                      | 17.0 (2.0–32.0)           | 17.0 (2.0–33.0) <sup>d</sup> |
| SOFA score         | Mean (SD)                             | 6.3 (2.3)                 | —                            |
|                    | Median (min–max)                      | 6.0 (0.0–15.0)            | —                            |
| CPIS               | Mean (SD)                             | 9.9 (1.8)                 | —                            |
|                    | Median (min–max)                      | 10.0 (5.0–13.0)           | —                            |
| CPIS, <i>n</i> (%) | ≤6                                    | 14 (6.1)                  | 25 (6.9)                     |
|                    | 7                                     | 17 (7.4)                  | 29 (8.0)                     |
|                    | 8                                     | 17 (7.4)                  | 45 (12.4)                    |
|                    | >8                                    | 183 (79.2)                | 263 (72.7)                   |
| Sex, <i>n</i> (%)  | Male                                  | 174 (75.3)                | 262 (72.4)                   |
|                    | Female                                | 57 (24.7)                 | 100 (27.6)                   |

| <b>Characteristic</b>                                        | <b>Statistic or group</b>        | <b>EEA population<br/>dataset (N = 231)</b> | <b>ITT population<br/>(N = 362)</b> |
|--------------------------------------------------------------|----------------------------------|---------------------------------------------|-------------------------------------|
| Race, <i>n</i> (%)                                           | Asian                            | 18 (7.8)                                    | 27 (7.5)                            |
|                                                              | Black or African American        | 6 (2.6)                                     | 10 (2.8)                            |
|                                                              | White                            | 194 (84.0)                                  | 301 (83.1)                          |
|                                                              | Native Hawaiian/Pacific Islander | 1 (0.4)                                     | 1 (0.3)                             |
|                                                              | Other/not reported               | 12 (5.2)                                    | 23 (6.4)                            |
| Region, <i>n</i> (%)                                         | North America                    | 8 (3.5)                                     | 15 (4.1)                            |
|                                                              | Latin America                    | 13 (5.6)                                    | 21 (5.8)                            |
|                                                              | Western Europe                   | 35 (15.2)                                   | 53 (14.6)                           |
|                                                              | Eastern Europe                   | 147 (63.6)                                  | 231 (63.8)                          |
|                                                              | Asia/Pacific                     | 18 (7.8)                                    | 28 (7.7)                            |
|                                                              | Rest of world                    | 10 (4.3)                                    | 14 (3.9)                            |
| Prior antibacterial therapy failure<br>for VNP, <i>n</i> (%) | Yes                              | 34 (14.7)                                   | 53 (14.6)                           |
| VABP diagnosis, <i>n</i> (%)                                 | Yes                              | 182 (78.8)                                  | 263 (72.7)                          |

| <b>Characteristic</b>                                  | <b>Statistic or group</b> | <b>EEA population<br/>dataset (N = 231)</b> | <b>ITT population<br/>(N = 362)</b> |
|--------------------------------------------------------|---------------------------|---------------------------------------------|-------------------------------------|
| Diabetes, <i>n</i> (%)                                 | Yes                       | 51 (22.1)                                   | 88 (24.3)                           |
| Congestive heart failure, <i>n</i> (%)                 | Yes                       | 37 (16.0)                                   | 55 (15.2)                           |
| Chronic obstructive pulmonary<br>disease, <i>n</i> (%) | Yes                       | 15 (6.5)                                    | 40 (11.0)                           |
| Bacteremic, <i>n</i> (%)                               | Yes                       | 37 (16.0)                                   | 25 (6.9)                            |
| Gram-negative adjunct therapy, <i>n</i><br>(%)         | Yes                       | 61 (26.4)                                   | 103 (28.5)                          |
| Gram-positive adjunct therapy, <i>n</i><br>(%)         | Yes                       | 224 (97.0)                                  | 350 (96.7)                          |
| PaO <sub>2</sub> /FiO <sub>2</sub> >240, <i>n</i> (%)  | Yes                       | 56 (24.2)                                   | 93 (25.7)                           |
| Empyema, <i>n</i> (%)                                  | No                        | 231 (100.0)                                 | 361 (99.7)                          |
| Pleural effusion, <i>n</i> (%)                         | No                        | 215 (93.1)                                  | 323 (89.2)                          |
| Ventilation of ≥5 days, <i>n</i> (%)                   | Yes                       | 125 (54.1)                                  | 182 (50.3)                          |
| Hospitalization of ≥5 days, <i>n</i> (%)               | Yes                       | 179 (77.5)                                  | 278 (76.8)                          |

| Characteristic                           | Statistic or group | EEA population            | ITT population          |
|------------------------------------------|--------------------|---------------------------|-------------------------|
|                                          |                    | dataset ( <i>N</i> = 231) | ( <i>N</i> = 362)       |
| Prior antibacterial use, <i>n</i> (%)    | Yes                | 214 (92.6)                | 318 (87.8)              |
| <i>Enterobacterales</i> , <i>n</i> (%)   | Yes                | 170 (73.6)                | 195 (73.9) <sup>e</sup> |
| Polymicrobial LRT pathogen, <i>n</i> (%) | Yes                | 91 (39.4)                 | 100 (37.9) <sup>e</sup> |

2 <sup>a</sup>APACHE, Acute Physiology and Chronic Health Evaluation; ARC, augmented renal clearance; CPIS, Clinical Pulmonary Infection  
3 Score; CrCl, creatinine clearance; EEA, exposure–efficacy analysis; ITT, intention-to-treat; LRT, lower respiratory tract; PaO<sub>2</sub>/FiOS,  
4 ratio of partial pressure of oxygen to fractional inspired oxygen; SOFA, Sequential Organ Failure Assessment; VABP, ventilator-  
5 associated bacterial pneumonia; VNP, ventilated nosocomial pneumonia.

6 <sup>b</sup>Calculated using central laboratory data.

7 <sup>c</sup>*N* = 359.

8 <sup>d</sup>*N* = 361.

9 <sup>e</sup>*N* = 264.

10

11 **TABLE S2** Summary of 28-day all-cause mortality and clinical cure at test of cure visit for ASPECT-NP participants by baseline  
 12 creatinine clearance group.<sup>a,b</sup>

13

---

| <b>Renal function subgroup</b> | <b><u>28-day all-cause mortality, n/N (%)</u></b> |               | <b><u>Clinical cure at test of cure, n/N (%)</u></b> |                |
|--------------------------------|---------------------------------------------------|---------------|------------------------------------------------------|----------------|
|                                | <b>Alive</b>                                      | <b>Death</b>  | <b>Cure</b>                                          | <b>Failure</b> |
| All                            | 195/231 (84.4)                                    | 36/231 (15.6) | 151/231 (65.4)                                       | 80/231 (34.6)  |
| CrCl ≥15 to <30 mL/min         | 8/11 (72.7)                                       | 3/11 (27.3)   | 5/11 (45.5)                                          | 6/11 (54.5)    |
| CrCl ≥30 to ≤50 mL/min         | 15/19 (78.9)                                      | 4/19 (21.1)   | 8/19 (42.1)                                          | 11/19 (57.9)   |
| CrCl >50 mL/min                | 172/201 (85.6)                                    | 29/201 (14.4) | 138/201 (68.7)                                       | 63/201 (31.3)  |

---

14 <sup>a</sup>CrCl, creatinine clearance.

15 <sup>b</sup>Calculated using central laboratory data.

16
